# Supplementary material for: An adaptive framework for utility-based optimization of scientific applications in the cloud
Source: Springer Nature journal article supplement (doi:10.1186/2192-113x-3-4), 2014-01-01

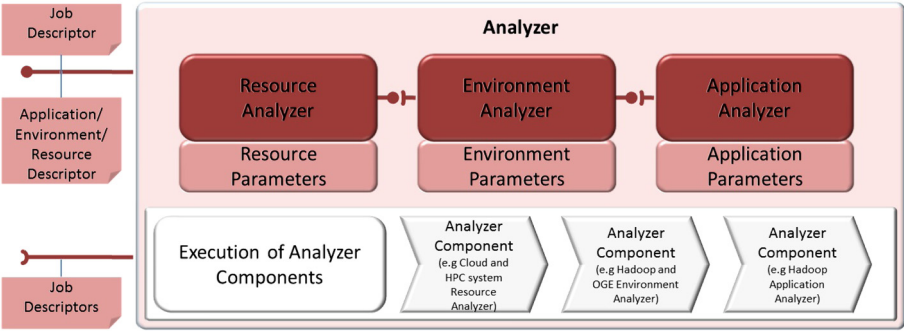

Supplement: 13677_2013_42_MOESM3_ESM.pdf [file 13677_2013_42_MOESM3_ESM.pdf]
